# Supplementary material for: Rational synthesis of hierarchical magnetic mesoporous silica microspheres with tunable mesochannels for enhanced enzyme immobilization
Source: Royal Society of Chemistry journal article supplement (doi:10.1039/c7cc04070a), 2017-01-01
Supplement: c7cc04070a1.pdf [file c7cc04070a1.pdf]

**Supporting information**

**Rational Synthesis of Hierarchical Magnetic Mesoporous Silica  
Microspheres with Tunable Mesochannels for Enhanced Enzymes  
Immobilization**

Dapeng Li,<sup>b</sup> Renxing Yi,<sup>b</sup> Jiangwei Tian,<sup>b</sup> Jinhua Li,<sup>b</sup> Boyang Yu<sup>a, b\*</sup> and Jin Qi<sup>a, b\*</sup>

<sup>a</sup>Department of Complex Prescription of Traditional Chinese Medicine, State Key Laboratory of  
Natural Medicines, China Pharmaceutical University, Nanjing 211198, PR China

<sup>b</sup>Jiangsu key Laboratory of TCM Evaluation and Translational Research, China Pharmaceutical  
University, Nanjing 211198, PR China

\*Co-corresponding authors:

E-mail: boyangyu59@163.com

E-mail: qijin2006@163.com

## 20 **Experimental Section**

21

### 22 *Materials and reagents*

23 FeCl<sub>3</sub>, trisodium citrate, sodium acetate, ethanol, ethylene glycol, cyclohexane,  
24 isopropanol, concentrated aqueous ammonia solution (28%), and triethanolamine (TEA)  
25 were obtained from Sinopharm Chemical Reagent Co., Ltd (Shanghai, China).  
26 Cetyltrimethylammonium chloride (CTAC), tetraethyl orthosilicate (TEOS), and  
27 dopamine were purchased from Alfa Aesar (Heysham, Lancs, UK). Xanthine oxidase  
28 (XOD) and catalase (CAT) were supplied by Sigma-Aldrich (St. Louis, MO, USA).  
29 Ultrapure water (18.2 MΩ) was prepared using a Milli-Q water purification system  
30 (Millipore, Bedford, MA, USA). All chemicals were of analytical grade and were used  
31 without further purification.

32

### 33 *Synthesis of Fe<sub>3</sub>O<sub>4</sub>@nSiO<sub>2</sub> microspheres*

34 Superparamagnetic Fe<sub>3</sub>O<sub>4</sub> particles were synthesized by a modified solvothermal reaction.  
35 Typically, FeCl<sub>3</sub> (0.65 g) and trisodium citrate (0.2 g) were dissolved in ethylene glycol  
36 (20 mL) under magnetic stirring, and sodium acetate (1.8 g) was gradually added. The  
37 mixture was stirred for 10 h, transferred into a 50-mL Teflon-lined stainless-steel  
38 autoclave, heated at 200°C for 10 h then cooled to room temperature. The obtained black  
39 product was washed with ethanol and deionized water three times and dried at 45°C under  
40 vacuum for 12 h prior to subsequent use.

41 Silica-coated Fe<sub>3</sub>O<sub>4</sub> microspheres were prepared according to the Stöber method as  
42 follows: as-synthesized Fe<sub>3</sub>O<sub>4</sub> particles (0.1 g) were homogeneously dispersed in a mixture  
43 of ethanol (40 mL) and deionized water (10 mL), and 1.2 mL of concentrated aqueous  
44 ammonia solution (28%) was added and the mixture sonicated for 1 h. After pre-stirring  
45 for 15 min at 30°C, TEOS (0.4 mL) was added dropwise and stirring continued for 4 h.

46 The obtained microspheres were collected, washed with ethanol and deionized water, and  
47 dried at 45°C under vacuum for 12 h.

48

#### 49 *Synthesis of MMSM-5IPA*

50 Core-shell structure microspheres with large dendritic mesopores were prepared using an  
51 improved approach of water/oil biphasic system. Briefly, Fe<sub>3</sub>O<sub>4</sub>@nSiO<sub>2</sub> microspheres (0.1  
52 g) prepared as described above were dispersed in a mixture of deionized water (60 mL),  
53 CTAC (3.0 g) and TEA (0.15 mL) and sonicated for 1 h, then stirred at 65 °C for 1 h.  
54 Cyclohexane (20 mL) containing 5% TEOS and 2.5% isopropanol was then added  
55 carefully to form a biliquid phase system. Self-assembly was performed at 65 °C for 12 h  
56 with gentle mechanical stirring, and products were collected by magnetic separation and  
57 washed with ethanol and water three times. To remove the template and organic phase, the  
58 obtained particles were extracted and refluxed with hydrochloric acid/ethanol solution at  
59 75°C for 12 h three times. Finally, the obtained sample was dried under vacuum at 45 °C  
60 overnight prior to further use.

61

#### 62 *Synthesis of MMSM-5IPA@PDA*

63 PDA modification of the interior of the pore walls was carried out using the procedure in  
64 which MMSM-5IPA (0.04 g) were redispersed in ethanol (10 mL) and 10 mM TRIS-HCl  
65 buffer (10 mL) and sonicated for 30 min. Deionized water (30 mL) containing 40 mg  
66 dopamine hydrochloride was then added while gently stirring and the mixture reacted for  
67 3 h. The obtained products (MMSM-5IPA@PDA) were washed with deionized water  
68 thoroughly.

69

70

71 *Immobilization of XOD, CAT, and enzymes activity assays*

72 MMSM-5IPA@PDA (1.0 mg) were first washed and equilibrated in 50 mM PBS buffer  
73 (pH 7.4) for 1 h, then 1000  $\mu$ L of PBS buffer containing XOD ( 15  $\mu$ g) or CAT (10  $\mu$ g)  
74 were added and incubated at 4 °C for 12 h with shaking. MMSM-5IPA@PDA immobilized  
75 with XOD or CAT were collected by magnetic separation, washed with deionized water to  
76 eliminate non-specific adsorption, and stored in the buffer at 4 °C until needed.

77 To determine the activity of XOD, the reaction mixtures containing 50  $\mu$ L XOD solution  
78 (15  $\mu$ g /mL) and 750  $\mu$ L PBS was initiated by adding 200  $\mu$ L xanthine (0.5 mM). The  
79 absorbance was measured at 290 nm each second at room temperature. Within 90 s (the  
80 initial rate), the curve of the slope of the absorbance reflected the enzyme activity.  
81 Similarly, the activity of CAT was determined by using the hydrogen peroxide ( $H_2O_2$ ) as  
82 substrates and record at 240 nm. Briefly, 50  $\mu$ L CAT (10  $\mu$ g/mL) mixed with 1000  $\mu$ L  
83  $H_2O_2$  (20 mM) rapidly and then record the enzymatic kinetics at UV 240 nm for the 60s.

84

85 *Measurements and characterization*

86 The morphology of samples was investigated using field-emission scanning electron  
87 microscopy (FE-SEM) on a Hitachi S-4800 microscope (Tokyo, Japan). Transmission  
88 electron microscopy (TEM) images were collected with a Tecnai 12 microscope  
89 (Eindhoven, The Netherlands) operating at 120 kV. For TEM measurements, the sample  
90 was dispersed in ethanol and dropped onto a carbon film Cu grid and dried thoroughly  
91 before measurement. X-ray diffraction (XRD) patterns were recorded on a Bruker D8  
92 Advance X-ray diffractometer (Karlsruhe, Germany) equipped with Cu  $K\alpha$  radiation and  
93 operated at 40 kV and 40 mA with a step of 0.02°. Nitrogen adsorption-desorption  
94 isotherms were measured at 77 K using a Micromeritics ASAP 2020 M+C system  
95 (Norcross, GA, USA). Samples were degassed at 423 K for 10 h under vacuum before

96 testing. The total pore volume was calculated from the amount adsorbed at a maximum  
97 relative pressure ( $P/P_0$ ) of 0.99. The Barrett-Joyner-Halenda (BJH) method was conducted  
98 to calculate the sample pore size from the desorption branches of the isotherms. The  
99 Brunauer-Emmett-Teller (BET) method was used to calculate the specific surface area.  
100 Fourier transform infrared (FTIR) spectra were recorded on a TENSOR 27  
101 spectrophotometer (Bruker, Ettlingen, Germany) with a spectral width of 4000–400  $\text{cm}^{-1}$ .  
102 X-ray photoelectron spectroscopy (XPS) was performed on an Escalab 250Xi X-ray  
103 photoelectron spectrometer (Thermo Fisher Scientific Inc., Waltham, MA, USA).  
104 Magnetic properties of samples were investigated using superconducting quantum  
105 interference device (SQUID) magnetometry.  
106

107

108

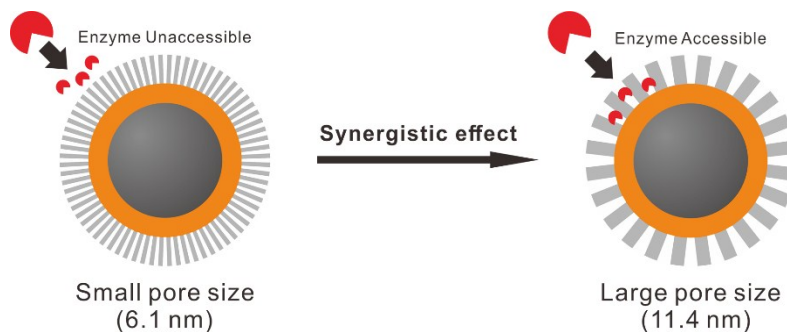

109

110 **Scheme S1.** The mesopores size can be enlarged by the synergetic effect of surfactant  
111 concentrate and amphiphilic agent IPA for enhancing the accessibility of  
112 biomacromolecules

113

114

115

116

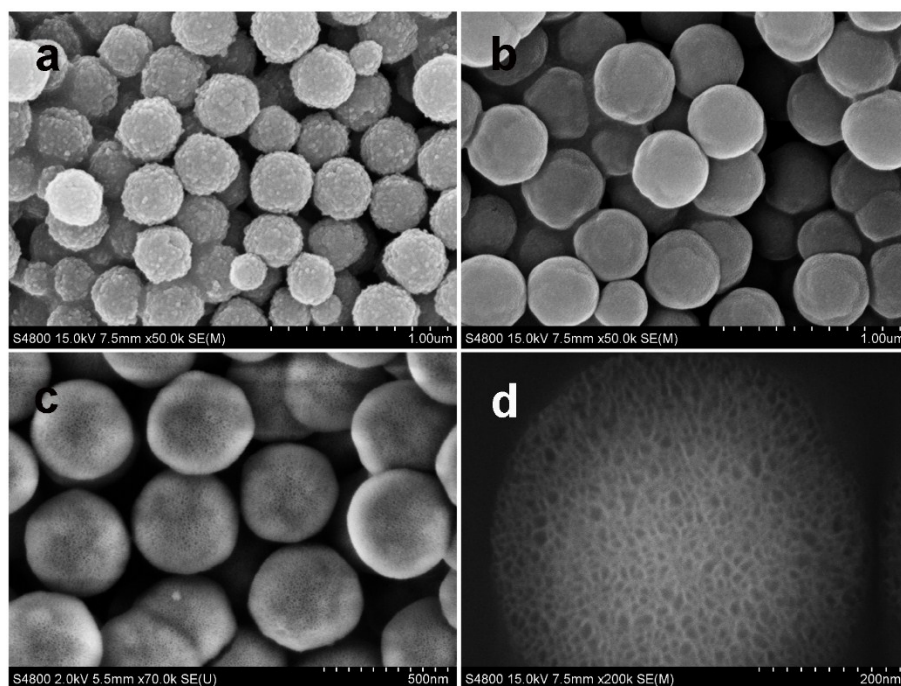

117

118 **Figure S1** FE-SEM images of Fe<sub>3</sub>O<sub>4</sub> nanoparticles (a), Fe<sub>3</sub>O<sub>4</sub>@nSiO<sub>2</sub> microspheres (b),

119 and MMSM-5IPA (c, d).

120

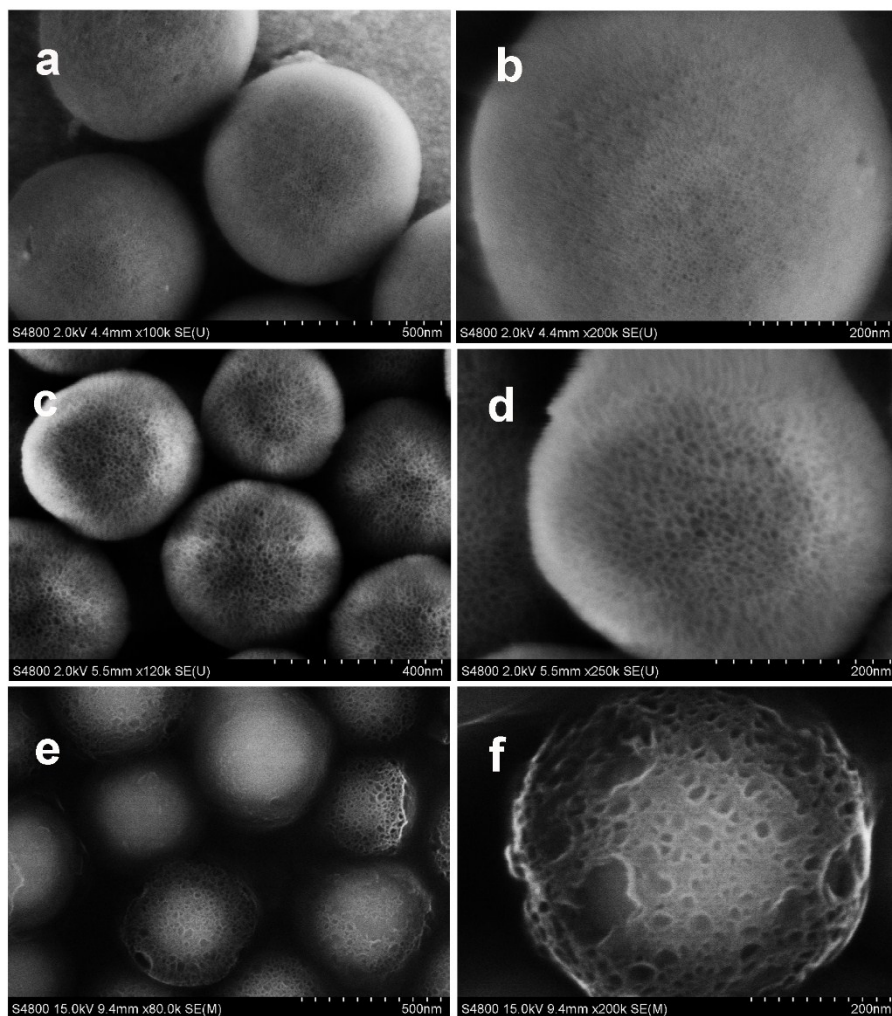

121

122 **Figure S2** FE-SEM images of MMSM-1 (a, b), MMSM-5 (c, d), and MMSM-10 (e, f)

123 synthesized with different CATC concentration of 1, 5, and 10 wt%, respectively.

124

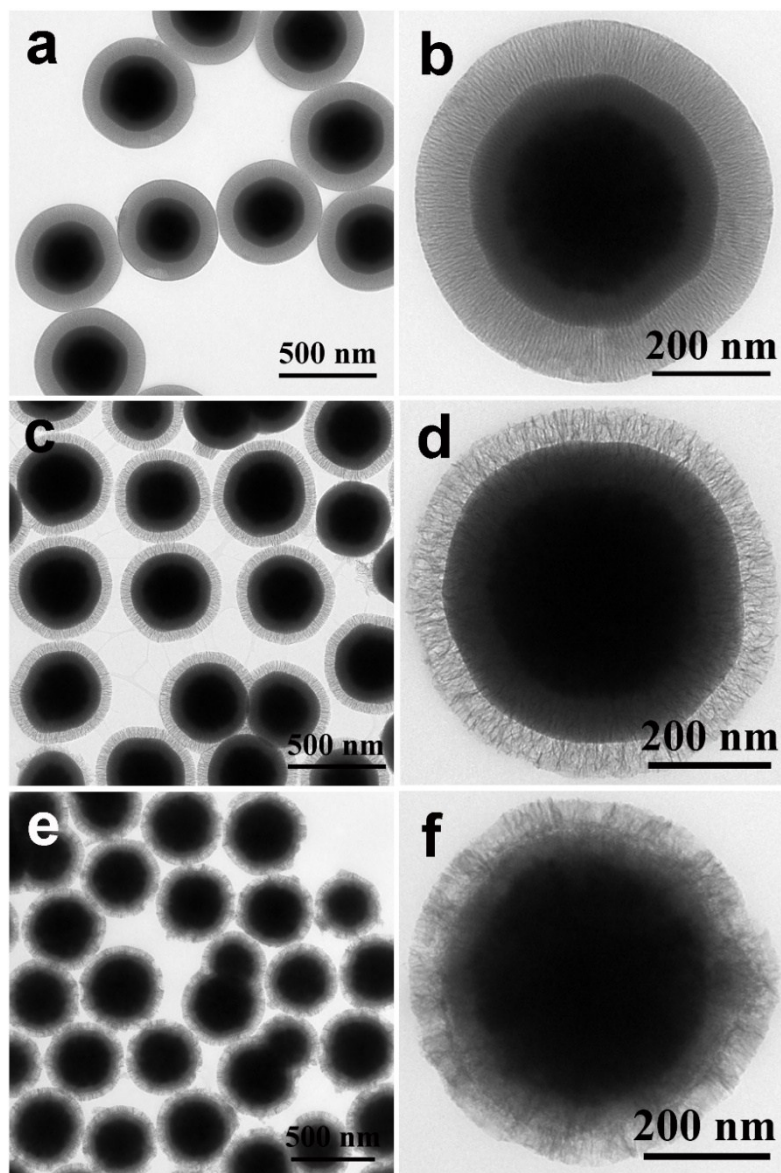

125

126 **Figure S3** TEM images of MMSM-1 (a, b), MMSM-5 (c, d), and MMSM-10 (e, f)  
 127 synthesized with different CATC concentration of 1, 5, and 10 wt%, respectively.

128

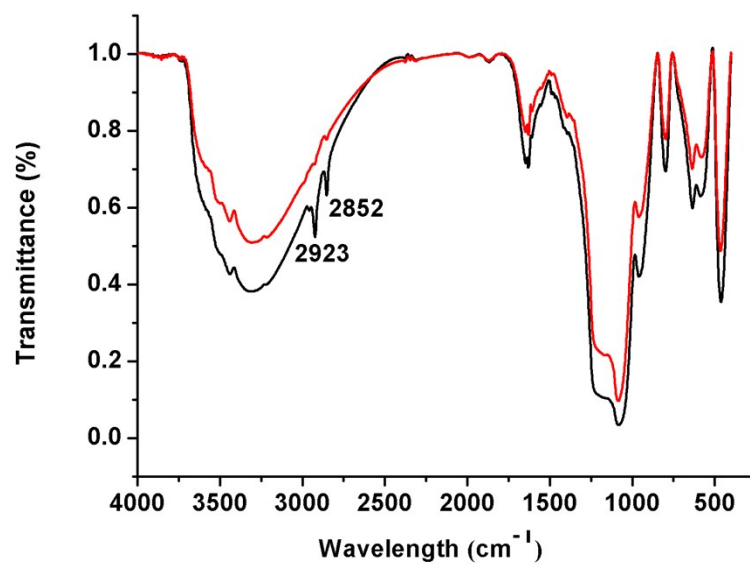

129

130 **Figure S4** FT-IR spectra of  $\text{Fe}_3\text{O}_4@\text{nSiO}_2@\text{CTAC}/\text{SiO}_2$  microspheres without extraction  
 131 of HCl/ethanol (black) and MMSM-5IPA particles after extraction with HCl/ethanol for  
 132 twice (red).

133

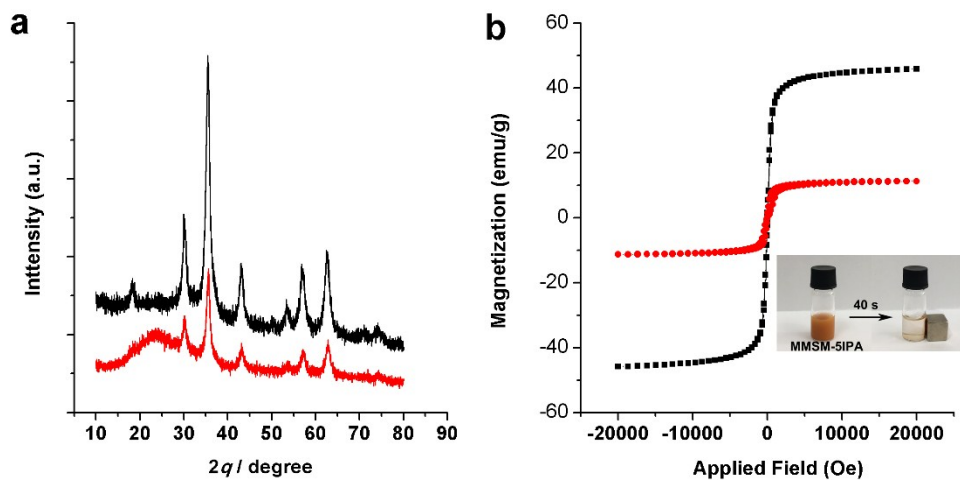

134

135

136 **Figure S5** Wide-angle X-ray diffraction spectra (a) and magnetic hysteresis loops (b) of  
 137  $\text{Fe}_3\text{O}_4$  (black) and MMSM-5IPA (red). Inset is the separation process of the MMSM-5IPA  
 138 by a magnet.

139

140

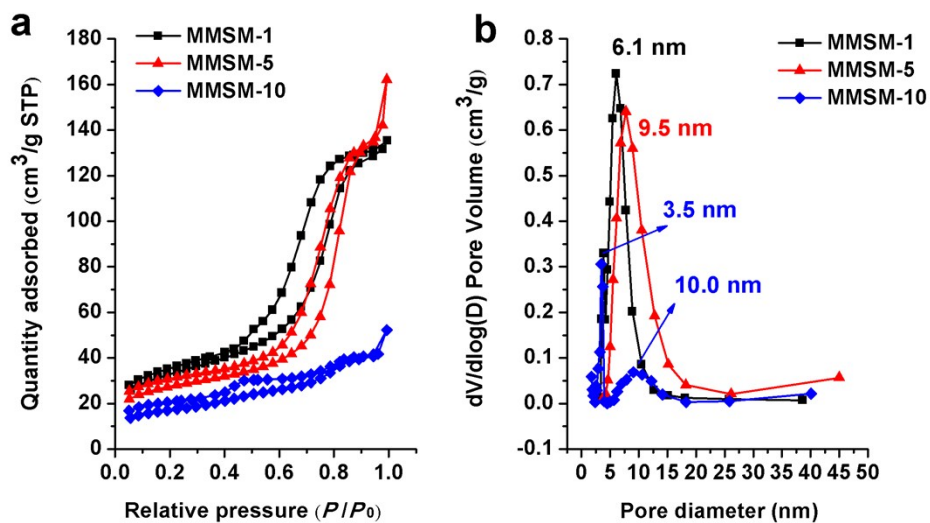

141

142

143 **Figure S6** Nitrogen adsorption-desorption isotherms (a) and pore size distribution curves  
 144 (b) of MMSM-1, MMSM-5, MMSM-10 microspheres with different with different CATC  
 145 concentration of 1, 5, and 10 wt%, respectively.

146

147

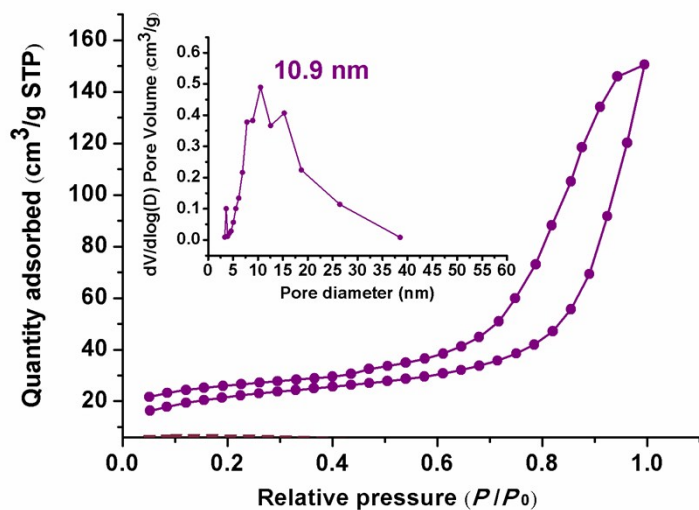

148

149 **Figure S7** Nitrogen adsorption-desorption isotherms of MMSM-5IPA@PDA

150 microspheres synthesized in ethanol aqueous solution. Inset is pore size distribution curve.

151

152

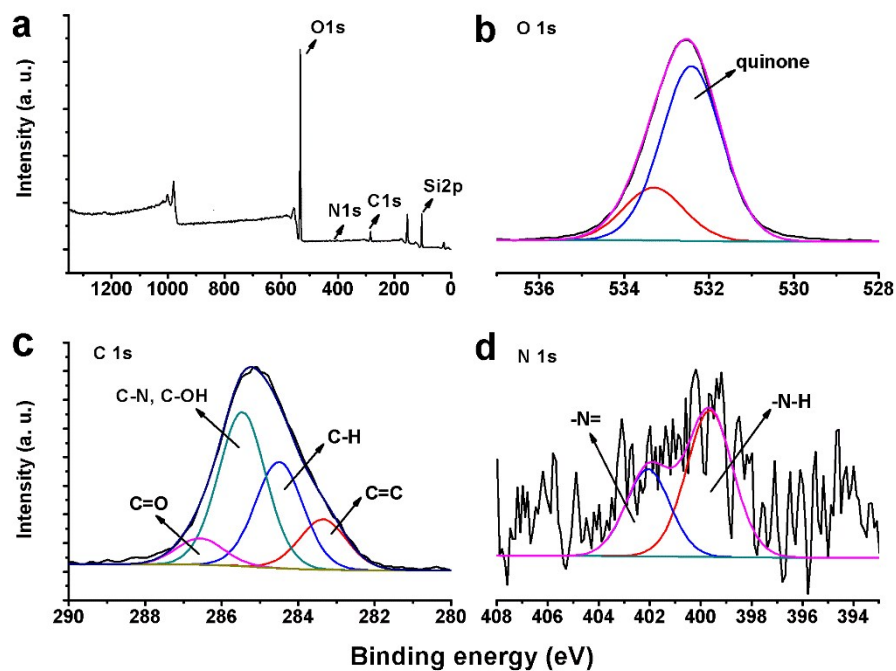

154

**Figure S8** XPS analysis of MMSM-5IPA@PDA survey scan (a) with high-resolution spectra of C 1s, O 1s, and N 1s. In O 1s spectra, peaks at 533.2 and 532.4 eV belong to quinone and catechol groups of PDA (b). The peaks in the C 1s spectrum at 286.4, 285.8, 284.5, and 283.4 eV correspond to C=O bonds (C-N and C-OH), C-H, and aromatic C, respectively (c). In the N 1s spectrum, the peak at 399.8 eV has a small shoulder at 402.2 eV, and was attributed to -NH- and -N= (d).

161

162

163

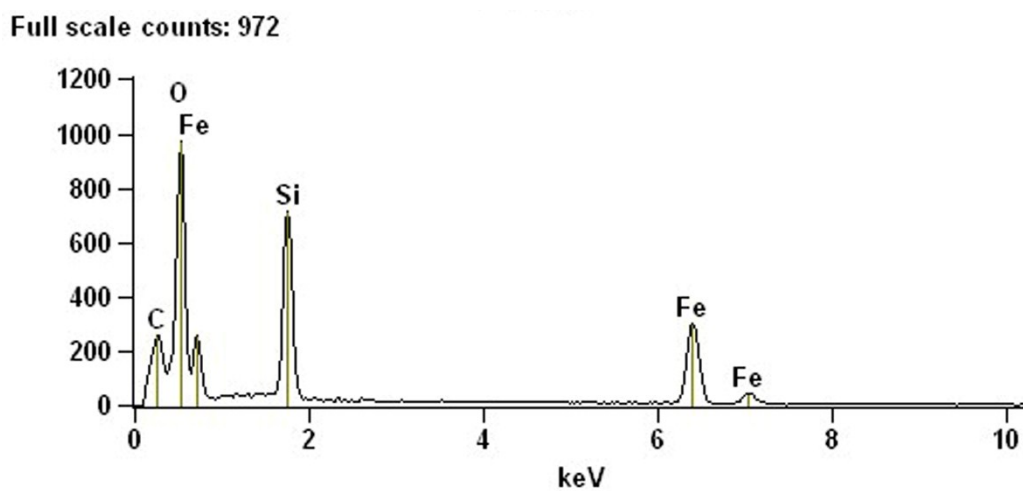

164

165 **Figure S9** EDX spectra of MMSM-5IPA@PDA.

166

167
